# Supplementary material for: Rationale and methods of a cluster-randomized controlled trial to promote active and healthy lifestyles among Brazilian students: the “Fortaleça sua Saúde” program
Source: BMC Public Health. 2015 Dec 7;15:1212. doi: 10.1186/s12889-015-2543-2 (PMC4671221; doi:10.1186/s12889-015-2543-2)
Supplement: Additional file 1: — CONSORT 2010 checklist of information to include when reporting a randomised trial*. (DOC 217 kb) [file 12889_2015_2543_MOESM1_ESM.doc]

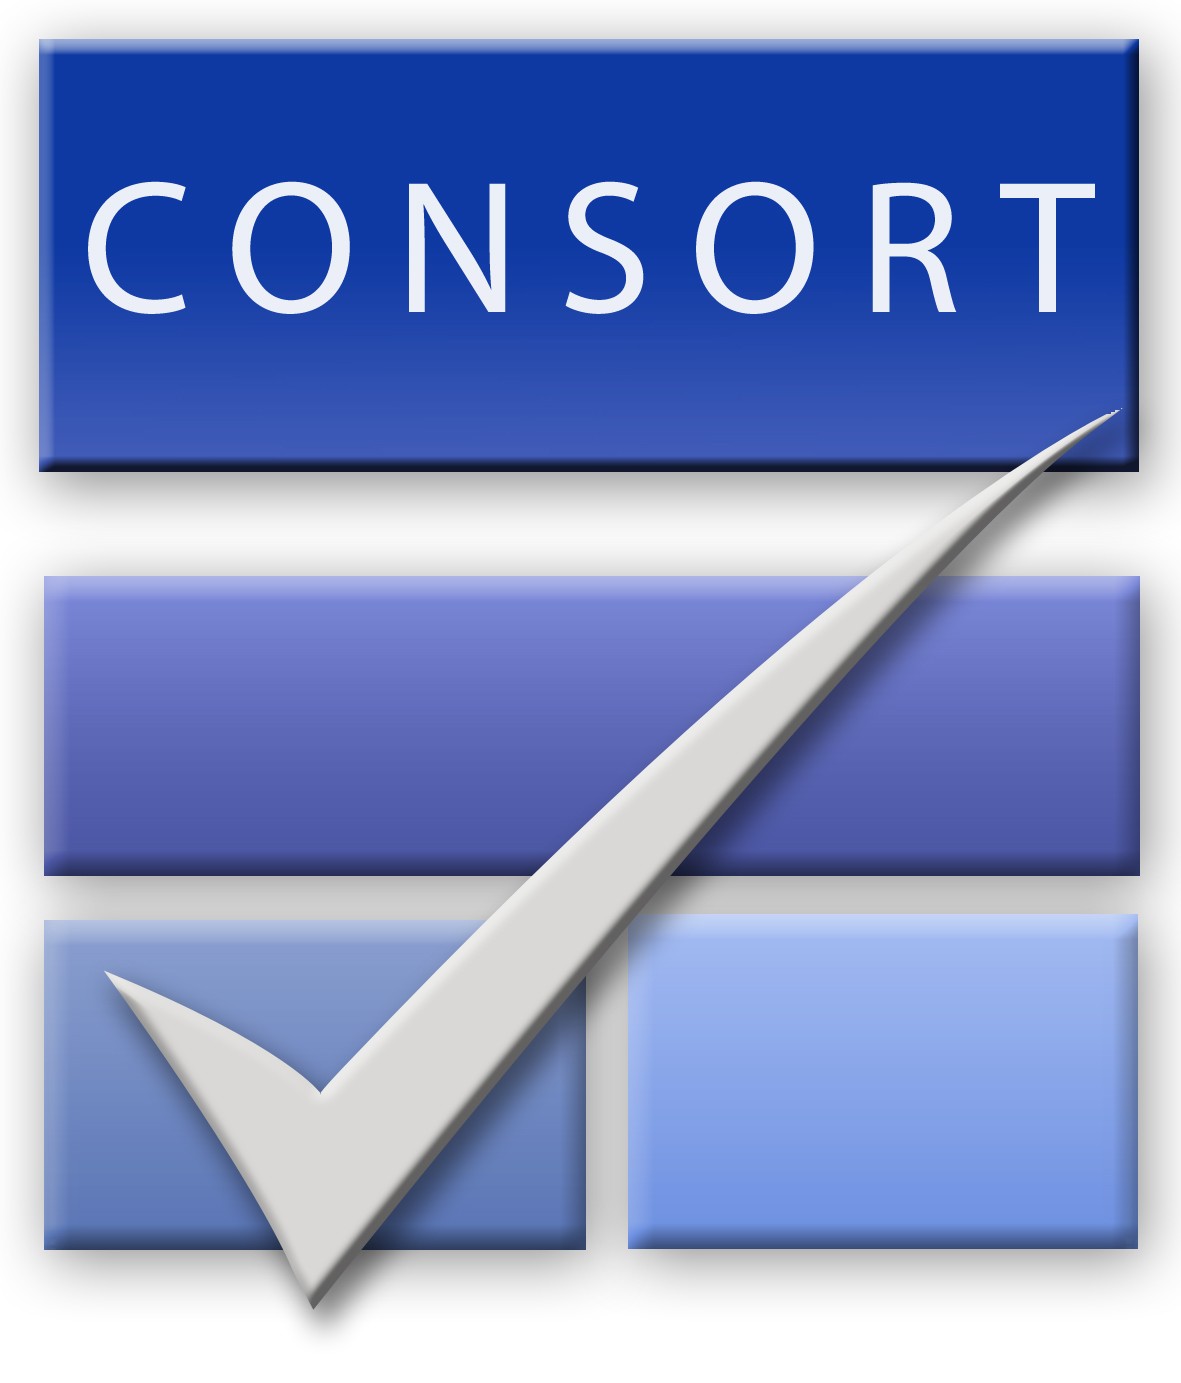
AUTHOR’S CHECKLIST

CONSORT 2010 checklist of information to include when reporting a randomised trial*

| Section/Topic | Item No | Checklist item | Reported on page No |
| --- | --- | --- | --- |
| Title and abstract | | | |
|  | 1a | Identification as a randomised trial in the title | Title (p.1) |
| 1b | Structured summary of trial design, methods, results, and conclusions | Abstract (p.2) |
| Introduction | | | |
| Background and objectives | 2a | Scientific background and explanation of rationale | Background and Rationale (p.4-9) |
| 2b | Specific objectives or hypotheses | p.6 and 10 |
| Methods | | | |
| Trial design | 3a | Description of trial design (such as parallel, factorial) including allocation ratio | p.10 |
| 3b | Important changes to methods after trial commencement (such as eligibility criteria), with reasons | Setting and population (p.11) and pilot study (p. 13) |
| Participants | 4a | Eligibility criteria for participants | Setting and population (p.11 and 12) |
| 4b | Settings and locations where the data were collected | Setting and population (p.10 and 11) |
| Interventions | 5 | The interventions for each group with sufficient details to allow replication, including how and when they were actually administered | Intervention (p.13-21,  Table 1 and Figure 1) |
| Outcomes | 6a | Completely defined pre-specified primary and secondary outcome measures, including how and when they were assessed | Outcome measures and evaluations (p.21-28 and Table 2) |
| 6b | Any changes to trial outcomes after the trial commenced, with reasons | Pilot study (p. 13) |
| Sample size | 7a | How sample size was determined | Statistical considerations (p.27) |
| 7b | When applicable, explanation of any interim analyses and stopping guidelines | Not applicable |
| Randomisation: |  |  |  |
| Sequence generation | 8a | Method used to generate the random allocation sequence | Recruitment of schools and students (p.11-12 and Figure 1) |
| 8b | Type of randomisation; details of any restriction (such as blocking and block size) | Recruitment of schools and students (p.11-12 and Figure 1) |
| Allocation concealment mechanism | 9 | Mechanism used to implement the random allocation sequence (such as sequentially numbered containers), describing any steps taken to conceal the sequence until interventions were assigned | Recruitment of schools and students (p.11-12 and Figure 1) |
| Implementation | 10 | Who generated the random allocation sequence, who enrolled participants, and who assigned participants to interventions | Recruitment of schools and students (p.11-12 and Figure 1) |
| Blinding | 11a | If done, who was blinded after assignment to interventions (for example, participants, care providers, those assessing outcomes) and how | Data collection (p.22)  Discussion (p.31) |
| 11b | If relevant, description of the similarity of interventions | Not applicable |
| Statistical methods | 12a | Statistical methods used to compare groups for primary and secondary outcomes | Statistical considerations (p.28) |
| 12b | Methods for additional analyses, such as subgroup analyses and adjusted analyses | Statistical considerations (p.28) |
| Results | | | |
| Participant flow (a diagram is strongly recommended) | 13a | For each group, the numbers of participants who were randomly assigned, received intended treatment, and were analysed for the primary outcome | Not applicable |
| 13b | For each group, losses and exclusions after randomisation, together with reasons | Not applicable |
| Recruitment | 14a | Dates defining the periods of recruitment and follow-up | Not applicable |
| 14b | Why the trial ended or was stopped | Not applicable |
| Baseline data | 15 | A table showing baseline demographic and clinical characteristics for each group | Not applicable |
| Numbers analysed | 16 | For each group, number of participants (denominator) included in each analysis and whether the analysis was by original assigned groups | Not applicable |
| Outcomes and estimation | 17a | For each primary and secondary outcome, results for each group, and the estimated effect size and its precision (such as 95% confidence interval) | Not applicable |
| 17b | For binary outcomes, presentation of both absolute and relative effect sizes is recommended | Not applicable |
| Ancillary analyses | 18 | Results of any other analyses performed, including subgroup analyses and adjusted analyses, distinguishing pre-specified from exploratory | Not applicable |
| Harms | 19 | All important harms or unintended effects in each group (for specific guidance see CONSORT for harms) | Not applicable |
| Discussion | | | |
| Limitations | 20 | Trial limitations, addressing sources of potential bias, imprecision, and, if relevant, multiplicity of analyses | Discussion (p.30 and 31) |
| Generalisability | 21 | Generalisability (external validity, applicability) of the trial findings | Discussion (p.29 and 32) |
| Interpretation | 22 | Interpretation consistent with results, balancing benefits and harms, and considering other relevant evidence | Discussion (p. 32) |
| Other information | | |  |
| Registration | 23 | Registration number and name of trial registry | p.3 |
| Protocol | 24 | Where the full trial protocol can be accessed, if available | p.3 |
| Funding | 25 | Sources of funding and other support (such as supply of drugs), role of funders | p.33 |
